# Supplementary material for: Tfam Knockdown Results in Reduction of mtDNA Copy Number, OXPHOS Deficiency and Abnormalities in Zebrafish Embryos
Source: PubMed Central journal article supplement (PMC7303330; doi:10.3389/fcell.2020.00381), 2020-06-12
Supplement: Data_Sheet_2.pdf [file Data_Sheet_2.pdf]

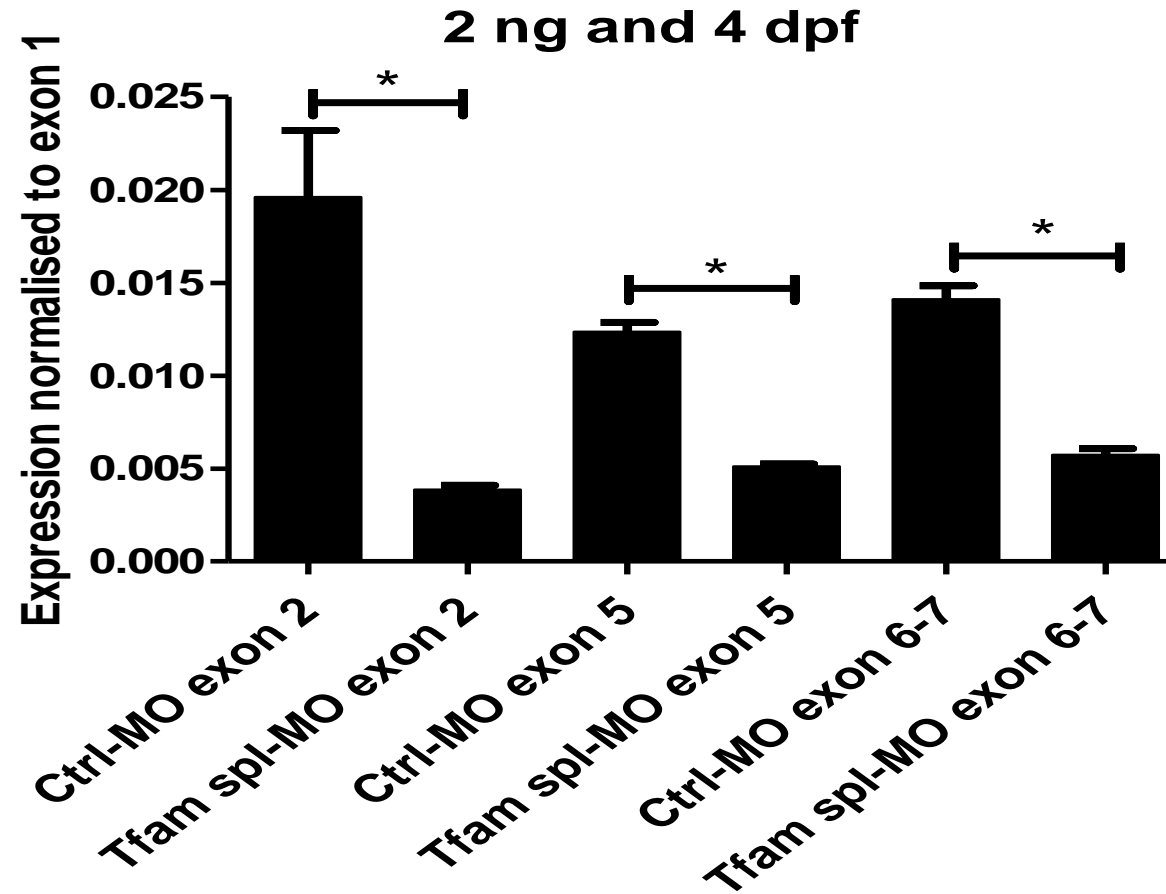

**Supplementary Figure S2.** Q-PCR analysis of *tfam* expression. Q-PCR analysis of expression of *tfam* exon 2,5 and 6-7 at day 4 in zebrafish injected with 2 ng *tfam* splice-MO compared to the Ctrl-MO (n= 6 per injected condition from gene expression analysis samples). Analysis of *tfam* exon 5 and exon 6-7 showed respectively 41% and 40% expression in *tfam* splice-MO injected embryos at day 4. This indicates that ~60% of *tfam* RNA is subjected to nonsense-mediated decay and that only half of the residual 40% *tfam* RNA is exon 2 containing wild-type RNA. Bars indicate mean values with SEM. P-values are calculated using ANOVA, \* p-value < 0.05.
